# Supplementary material for: Soil surface temperatures reveal moderation of the urban heat island effect by trees and shrubs
Source: PubMed Central journal article supplement (PMC5027384; doi:10.1038/srep33708), 2016-09-19
Supplement: srep33708-s1.pdf [file srep33708-s1.pdf]

## Supplementary Material

### Soil surface temperatures reveal moderation of the urban heat island effect by trees and shrubs

J.L. Edmondson, I. Stott, Z.G. Davies, K.J. Gaston, J.R. Leake

**Table S1:** OVERALL mean daily temperature: AIC rankings from all models. A '+' indicates a variable or interaction that is included in a model. A '\*' indicates a model that is included in the average model, i.e. where  $\Delta AIC < (0.05 * \max(\Delta AIC))$ . Models are listed in order of increasing AIC, therefore in order of decreasing likelihood.

| Model terms                    |                                  |                                     |                                  |                                |                                  | Model likelihoods                         |      |                |          |              |        |
|--------------------------------|----------------------------------|-------------------------------------|----------------------------------|--------------------------------|----------------------------------|-------------------------------------------|------|----------------|----------|--------------|--------|
| Distance from city centre (km) | Vegetation (herbaceous or woody) | Land-use (domestic or non-domestic) | Distance: Vegetation interaction | Distance: Land-use interaction | Vegetation: Land-use interaction | Distance: Vegetation:Land-use interaction | df   | log-likelihood | AIC      | $\Delta AIC$ | weight |
| +                              | +                                | +                                   |                                  |                                | +                                |                                           | * 10 | -9953.64       | 19927.30 | 0.00         | 0.279  |
| +                              | +                                | +                                   |                                  |                                |                                  |                                           | * 9  | -9955.11       | 19928.20 | 0.95         | 0.174  |
| +                              | +                                | +                                   |                                  | +                              | +                                |                                           | * 11 | -9953.36       | 19928.70 | 1.44         | 0.136  |
| +                              | +                                | +                                   | +                                |                                | +                                |                                           | * 11 | -9953.56       | 19929.10 | 1.85         | 0.110  |
| +                              | +                                | +                                   |                                  | +                              |                                  |                                           | * 10 | -9954.62       | 19929.20 | 1.96         | 0.105  |
| +                              | +                                | +                                   | +                                |                                |                                  |                                           | 10   | -9955.01       | 19930.00 | 2.74         | 0.071  |
| +                              | +                                | +                                   | +                                | +                              | +                                |                                           | 12   | -9953.31       | 19930.60 | 3.35         | 0.052  |
| +                              | +                                | +                                   | +                                | +                              |                                  |                                           | 11   | -9954.56       | 19931.10 | 3.84         | 0.041  |
| +                              | +                                | +                                   | +                                | +                              | +                                | +                                         | 13   | -9953.25       | 19932.50 | 5.24         | 0.020  |
| +                              | +                                |                                     |                                  |                                |                                  |                                           | 8    | -9959.36       | 19934.70 | 7.44         | 0.007  |
| +                              | +                                |                                     | +                                |                                |                                  |                                           | 9    | -9959.24       | 19936.50 | 9.20         | 0.003  |
|                                | +                                | +                                   |                                  |                                | +                                |                                           | 9    | -9959.70       | 19937.40 | 10.13        | 0.002  |
|                                | +                                | +                                   |                                  |                                |                                  |                                           | 8    | -9960.81       | 19937.60 | 10.35        | 0.002  |
|                                | +                                |                                     |                                  |                                |                                  |                                           | 7    | -9964.01       | 19942.00 | 14.75        | 0.000  |
| +                              |                                  | +                                   |                                  |                                |                                  |                                           | 8    | -9976.36       | 19968.70 | 41.45        | 0.000  |
| +                              |                                  | +                                   |                                  | +                              |                                  |                                           | 9    | -9976.22       | 19970.40 | 43.17        | 0.000  |
| +                              |                                  |                                     |                                  |                                |                                  |                                           | 7    | -9979.58       | 19973.20 | 45.88        | 0.000  |
|                                |                                  | +                                   |                                  |                                |                                  |                                           | 7    | -9981.61       | 19977.20 | 49.94        | 0.000  |
|                                |                                  |                                     |                                  |                                |                                  |                                           | 6    | -9984.05       | 19980.10 | 52.82        | 0.000  |

Coefficients of model average for daily mean temperature. Note that daily mean temperature is mean-centred and scaled individually for each day.

|                 | Herbaceous<br>Domestic | Woody<br>Domestic | Herbaceous<br>Non-domestic | Woody<br>Non-domestic |
|-----------------|------------------------|-------------------|----------------------------|-----------------------|
| Intercept       | 1.003315               | 0.36612           | 0.8077016                  | -0.0242679            |
| Slope with dist | -0.1202223             | -0.1192172        | -0.1277303                 | -0.1267253            |

WINTER mean daily temperature (December, January and February): AIC rankings from all models. A '+' indicates a variable or interaction that is included in a model. A '\*' indicates a model that is included in the average model, i.e. where  $\Delta AIC < (0.05 * \max(\Delta AIC))$ . Models are listed in order of increasing AIC, therefore in order of decreasing likelihood.

| Model terms                       |                                        |                                            |                                        |                                    |                                      |                                                 | Model likelihoods |                |         |              |        |
|-----------------------------------|----------------------------------------|--------------------------------------------|----------------------------------------|------------------------------------|--------------------------------------|-------------------------------------------------|-------------------|----------------|---------|--------------|--------|
| Distance<br>(from city<br>centre) | Vegetation<br>(herbaceous or<br>woody) | Land-use<br>(domestic or non-<br>domestic) | Distance:<br>Vegetation<br>interaction | Distance: Land-<br>use interaction | Vegetation: Land-<br>use interaction | Distance:<br>Vegetation:Land-use<br>interaction | df                | log-likelihood | AIC     | $\Delta AIC$ | weight |
| +                                 | +                                      | +                                          | +                                      | +                                  |                                      |                                                 | * 11              | -666.80        | 1355.60 | 0.00         | 0.279  |
| +                                 | +                                      | +                                          | +                                      | +                                  | +                                    |                                                 | * 12              | -665.91        | 1355.80 | 0.21         | 0.251  |
| +                                 | +                                      | +                                          |                                        | +                                  |                                      |                                                 | * 10              | -668.45        | 1356.90 | 1.30         | 0.146  |
| +                                 | +                                      | +                                          |                                        | +                                  | +                                    |                                                 | * 11              | -667.65        | 1357.30 | 1.70         | 0.119  |
| +                                 | +                                      | +                                          | +                                      | +                                  | +                                    | +                                               | * 13              | -665.68        | 1357.40 | 1.75         | 0.116  |
|                                   | +                                      | +                                          |                                        |                                    | +                                    |                                                 | 9                 | -671.41        | 1360.80 | 5.21         | 0.021  |
|                                   | +                                      | +                                          |                                        |                                    |                                      |                                                 | 8                 | -672.76        | 1361.50 | 5.92         | 0.014  |
| +                                 | +                                      | +                                          | +                                      |                                    | +                                    |                                                 | 11                | -669.90        | 1361.80 | 6.19         | 0.013  |
| +                                 | +                                      | +                                          |                                        |                                    | +                                    |                                                 | 10                | -671.02        | 1362.00 | 6.43         | 0.011  |
| +                                 | +                                      | +                                          |                                        |                                    |                                      |                                                 | 9                 | -672.34        | 1362.70 | 7.07         | 0.008  |
| +                                 | +                                      | +                                          | +                                      |                                    |                                      |                                                 | 10                | -671.36        | 1362.70 | 7.11         | 0.008  |
|                                   | +                                      |                                            |                                        |                                    |                                      |                                                 | 7                 | -674.52        | 1363.00 | 7.45         | 0.007  |
| +                                 | +                                      |                                            |                                        |                                    |                                      |                                                 | 8                 | -674.22        | 1364.40 | 8.84         | 0.003  |
| +                                 | +                                      |                                            | +                                      |                                    |                                      |                                                 | 9                 | -673.23        | 1364.50 | 8.85         | 0.003  |
| +                                 |                                        | +                                          |                                        | +                                  |                                      |                                                 | 9                 | -676.00        | 1370.00 | 14.39        | 0.000  |
|                                   |                                        | +                                          |                                        |                                    |                                      |                                                 | 7                 | -679.00        | 1372.00 | 16.40        | 0.000  |
|                                   |                                        |                                            |                                        |                                    |                                      |                                                 | 6                 | -680.26        | 1372.50 | 16.91        | 0.000  |
| +                                 |                                        | +                                          |                                        |                                    |                                      |                                                 | 8                 | -678.90        | 1373.80 | 18.19        | 0.000  |
| +                                 |                                        |                                            |                                        |                                    |                                      |                                                 | 7                 | -680.19        | 1374.40 | 18.78        | 0.000  |

Coefficients of model average for daily minimum temperature. Note that daily minimum temperature is mean-centred and scaled individually for each day.

|                 | Herbaceous<br>Domestic | Woody<br>Domestic | Herbaceous<br>Non-domestic | Woody<br>Non-domestic |
|-----------------|------------------------|-------------------|----------------------------|-----------------------|
| Intercept       | 0.7270059              | 0.9740042         | -0.3717211                 | 0.0206315             |
| Slope with dist | -0.2939699             | -0.2371177        | -0.014946                  | 0.03703782            |

SUMMER mean daily temperature (May, June and July): AIC rankings from all models. A '+' indicates a variable or interaction that is included in a model. A '\*' indicates a model that is included in the average model, i.e. where  $\Delta AIC < (0.05 * \max(\Delta AIC))$ . Models are listed in order of increasing AIC, therefore in order of decreasing likelihood.

| Model terms                       |                                        |                                            |                                        |                                    |                                      |                                                 | Model likelihoods |                |         |              |        |
|-----------------------------------|----------------------------------------|--------------------------------------------|----------------------------------------|------------------------------------|--------------------------------------|-------------------------------------------------|-------------------|----------------|---------|--------------|--------|
| Distance<br>(from city<br>centre) | Vegetation<br>(herbaceous or<br>woody) | Land-use<br>(domestic or non-<br>domestic) | Distance:<br>Vegetation<br>interaction | Distance: Land-<br>use interaction | Vegetation: Land-<br>use interaction | Distance:<br>Vegetation:Land-use<br>interaction | df                | log-likelihood | AIC     | $\Delta AIC$ | weight |
| +                                 | +                                      | +                                          |                                        | +                                  | +                                    |                                                 | * 11              | -4385.84       | 8793.70 | 0.00         | 0.479  |
| +                                 | +                                      | +                                          | +                                      | +                                  | +                                    |                                                 | * 12              | -4385.58       | 8795.20 | 1.49         | 0.228  |
| +                                 | +                                      | +                                          | +                                      | +                                  | +                                    | +                                               | * 13              | -4385.43       | 8796.90 | 3.18         | 0.098  |
| +                                 | +                                      | +                                          |                                        | +                                  |                                      |                                                 | * 10              | -4388.81       | 8797.60 | 3.93         | 0.067  |
| +                                 | +                                      | +                                          |                                        |                                    | +                                    |                                                 | * 10              | -4388.89       | 8797.80 | 4.11         | 0.062  |
| +                                 | +                                      | +                                          | +                                      | +                                  |                                      |                                                 | * 11              | -4388.61       | 8799.20 | 5.53         | 0.030  |
| +                                 | +                                      | +                                          | +                                      |                                    | +                                    |                                                 | * 11              | -4388.80       | 8799.60 | 5.93         | 0.025  |
|                                   |                                        | +                                          |                                        |                                    | +                                    |                                                 | * 9               | -4392.61       | 8803.20 | 9.54         | 0.004  |
| +                                 | +                                      | +                                          |                                        |                                    |                                      |                                                 | * 9               | -4392.65       | 8803.30 | 9.62         | 0.004  |
| +                                 | +                                      | +                                          | +                                      |                                    |                                      |                                                 | 10                | -4392.61       | 8805.20 | 11.53        | 0.002  |
| +                                 | +                                      |                                            |                                        |                                    |                                      |                                                 | 8                 | -4395.14       | 8806.30 | 12.61        | 0.001  |
|                                   | +                                      | +                                          |                                        |                                    |                                      |                                                 | 8                 | -4395.84       | 8807.70 | 14.00        | 0.000  |
| +                                 | +                                      |                                            | +                                      |                                    |                                      |                                                 | 9                 | -4395.12       | 8808.20 | 14.55        | 0.000  |
|                                   | +                                      |                                            |                                        |                                    |                                      |                                                 | 7                 | -4397.84       | 8809.70 | 16.00        | 0.000  |
| +                                 |                                        | +                                          |                                        |                                    |                                      |                                                 | 8                 | -4430.48       | 8877.00 | 83.29        | 0.000  |
| +                                 |                                        | +                                          |                                        | +                                  |                                      |                                                 | 9                 | -4429.50       | 8877.00 | 83.33        | 0.000  |
| +                                 |                                        |                                            |                                        |                                    |                                      |                                                 | 7                 | -4432.05       | 8878.10 | 84.41        | 0.000  |
|                                   |                                        | +                                          |                                        |                                    |                                      |                                                 | 7                 | -4433.28       | 8880.60 | 86.89        | 0.000  |
|                                   |                                        |                                            |                                        |                                    |                                      |                                                 | 6                 | -4434.53       | 8881.10 | 87.37        | 0.000  |

Coefficients of model average for dail maximumy temperature. Note that daily maximum temperature is mean-centred and scaled individually for each day.

---

|                 | Herbaceous<br>Domestic | Woody<br>Domestic | Herbaceous<br>Non-domestic | Woody<br>Non-domestic |
|-----------------|------------------------|-------------------|----------------------------|-----------------------|
| Intercept       | 1.37293                | -0.304961         | 2.543842                   | -0.336347             |
| Slope with dist | 0.0937175              | 0.06259265        | -0.279203                  | -0.2968509            |

---
